# Supplementary material for: Enzymatic Epoxidation of Long-Chain Terminal Alkenes by Fungal Peroxygenases
Source: MDPI journal article supplement (doi:10.3390/antiox11030522), 2022-03-08
Supplement: s1 [file s1]

---

## SUPPLEMENTARY MATERIALS

### Enzymatic epoxidation of long-chain terminal alkenes by fungal peroxygenases

Esteban D. Babot <sup>1</sup>, Carmen Aranda <sup>2</sup>, Jan Kiebst <sup>3</sup>, Katrin Scheibner <sup>3</sup>, René Ullrich <sup>4</sup>, Martin Hofrichter <sup>4</sup>, Angel T. Martínez <sup>5</sup> and Ana Gutiérrez <sup>1,\*</sup>

<sup>1</sup> Instituto de Recursos Naturales y Agrobiología de Sevilla, CSIC, E-41012 Seville, Spain. edbabot@irnase.csic.es (E.D.B.); anagu@irnase.csic.es (A.G.)

<sup>2</sup> Johnson Matthey, Cambridge Science Park U260, Cambridge CB4 0FP, UK. Carmen.Aranda@matthey.com (C.A.)

<sup>3</sup> Institute of Biotechnology, Brandenburg University of Technology Cottbus-Senftenberg, 01968 Senftenberg, Germany. jan.kiebst@b-tu.de (J.K.); katrin.scheibner@b-tu.de (K.S)

<sup>4</sup> Unit of Bio- and Environmental Sciences, TU Dresden, International Institute Zittau, 02763 Zittau, Germany. ullrich@tu-dresden.de (R.U.); martin.hofrichter@tu-dresden.de (M.H.)

<sup>5</sup> Centro de Investigaciones Biológicas "Margarita Salas", CSIC, E-28040 Madrid, Spain. ATMartinez@cib.csic.es (A.T.M.)

\* Correspondence: anagu@irnase.csic.es; +34 954624711.

This Supplementary Materials includes: Mass spectra of epoxy- and hydroxy-epoxy-alkanes (**Figure S1**) and hydroxy-alkenes (**Figure S2**), the two latter as trimethylsilyl derivatives, from reactions of 1-tetradecene with rCcUPO; Inventory of products in the reactions of nine terminal alkenes with six UPOs (**Table S1**); and GC-MS analysis of 1-tetradecene reactions with several UPOs (**Figure S3**).

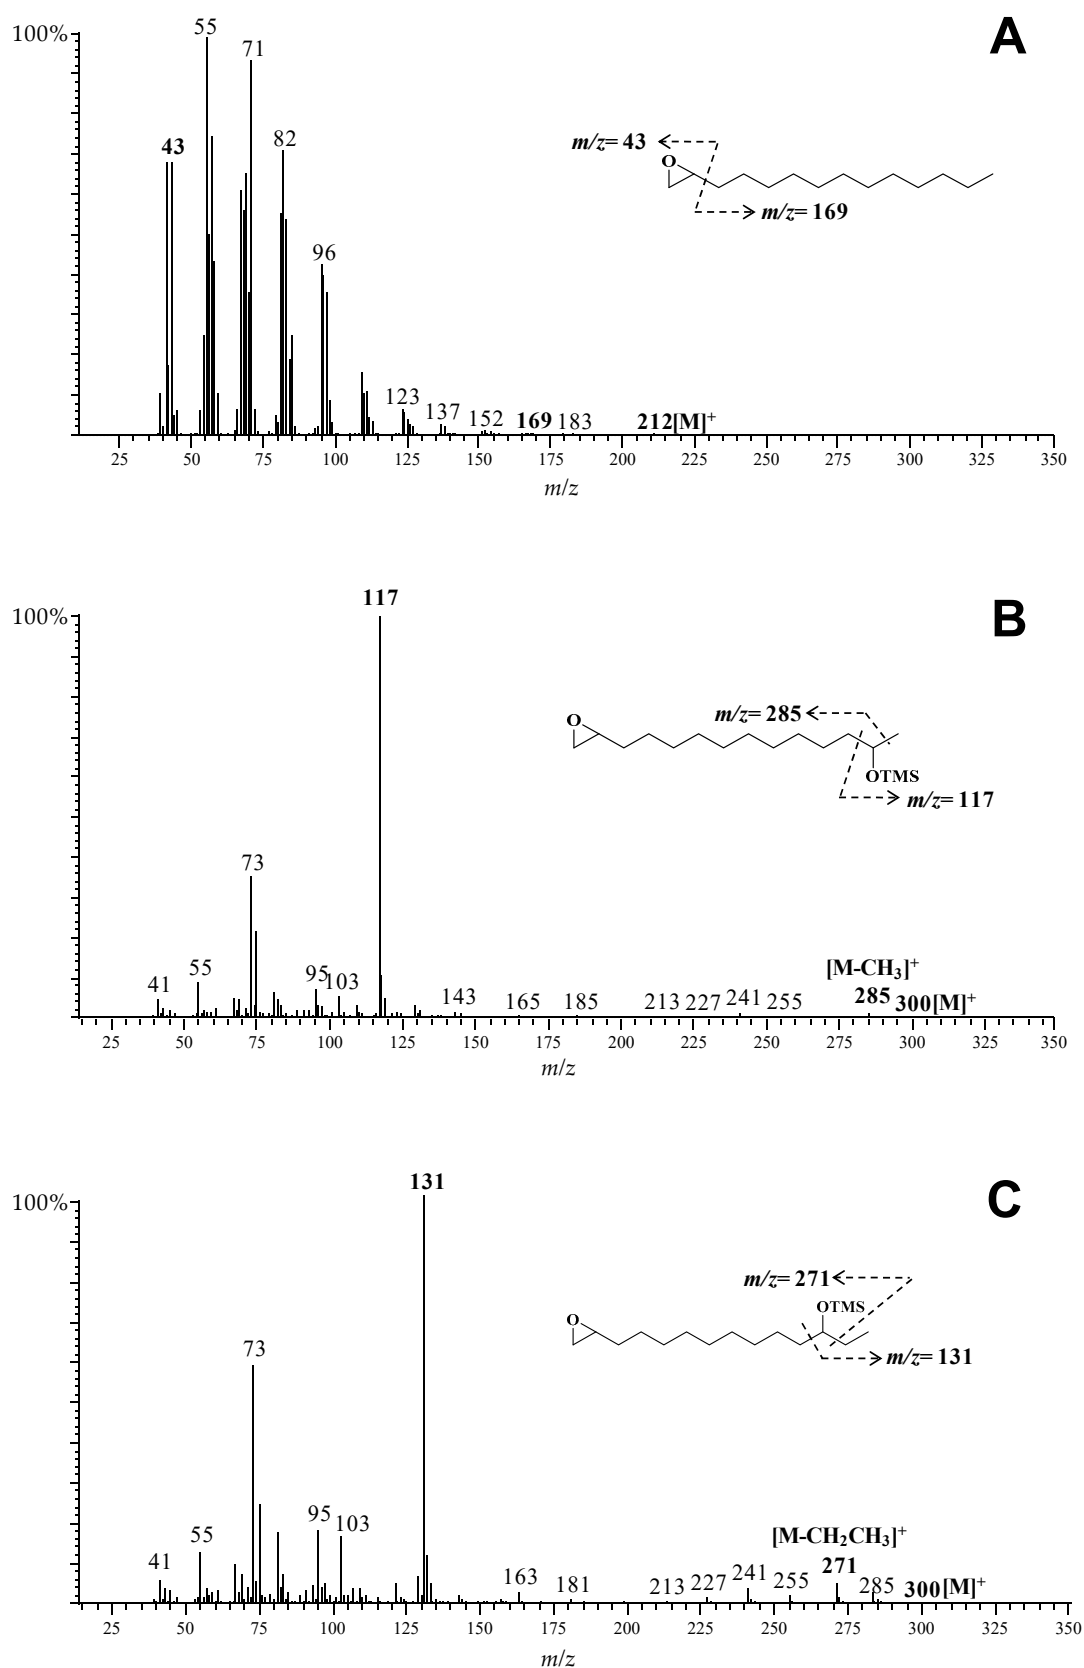

**Figure S1.** Mass spectra of epoxy- and hydroxy-epoxy- alkanes, the latter as trimethylsilyl derivatives, from reactions of 1-tetradecene with rCciUPO. **A)** 1,2-epoxytetradecane, **B)** 1,2-epoxytetradec-13-ol; and **C)** 1,2-epoxytetradec-12-ol.

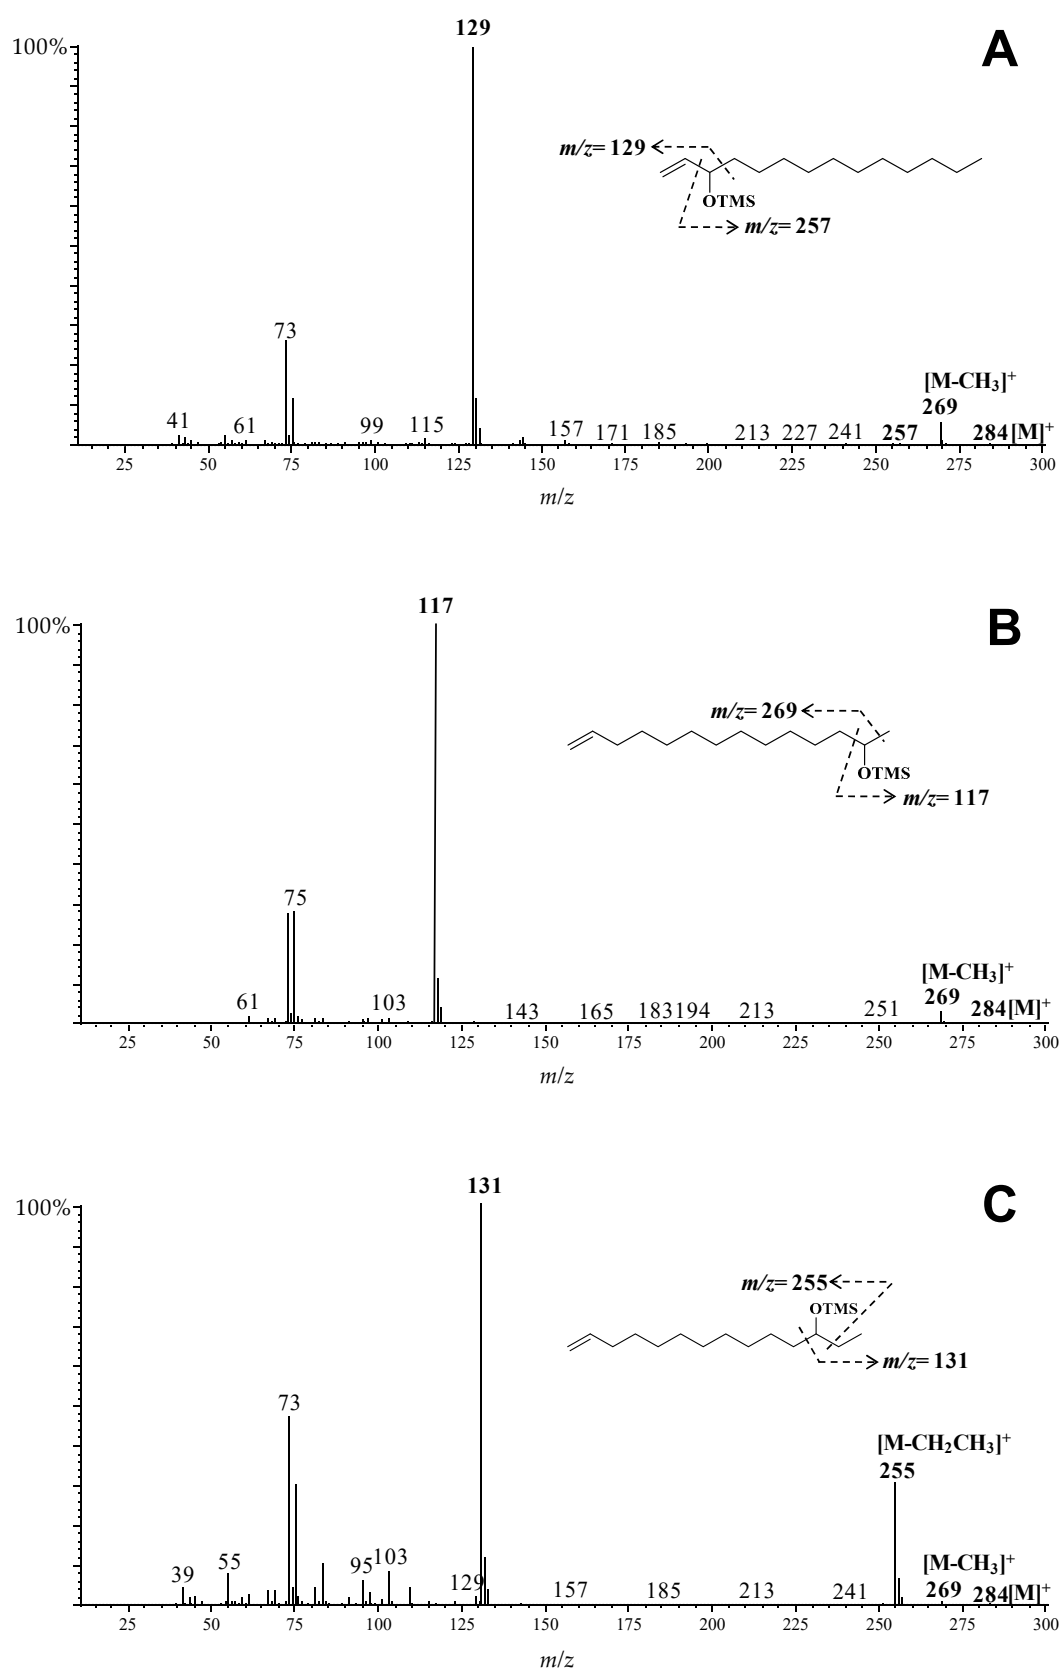

**Figure S2.** Mass spectra of hydroxy-alkenes, as trimethylsilyl derivatives, from reactions of 1-tetradecene with rCciUPO; A) tetradecen-3-ol, B) tetradecen-13-ol, and C) tetradecen-12-ol.

**Table S1.** Inventory of products in the reactions (2 h, 60% acetone, and 3 mM H<sub>2</sub>O<sub>2</sub>) of nine terminal alkenes (1 mM C<sub>12:1</sub>–C<sub>20:1</sub>) with six UPOs (3 μM) yielding: 1,2-epoxy- (**E**), 3-hydroxy- (**3-ol**), other hydroxy- (**HD**), hydroxy-epoxy- (**ED**), dihydroxy- (**di-OH**), and carboxylic- (**COOH**) derivatives.

| UPO/alkene      | Products (μM) |       |       |       |       |      | Total |
|-----------------|---------------|-------|-------|-------|-------|------|-------|
|                 | E             | 3-ol  | HD    | ED    | di-OH | COOH |       |
| <i>Aae</i> UPO  |               |       |       |       |       |      |       |
| 1-dodecene      | 57.5          | 38.5  | 22.2  | --    | --    | --   | 118.2 |
| 1-tridecene     | 96.1          | 61.8  | 35.3  | 4.7   | --    | --   | 197.9 |
| 1-tetradecene   | 83.8          | 75.8  | 21.8  | 5.6   | --    | 0.6  | 187.5 |
| 1-pentadecene   | 61.9          | 48.1  | 26.8  | 4.0   | --    | --   | 140.8 |
| 1-hexadecene    | 84.7          | 54.7  | 33.7  | 6.0   | --    | --   | 179.2 |
| 1-heptadecene   | 72.7          | 48.6  | 22.9  | 8.4   | --    | 0.9  | 153.6 |
| 1-octadecene    | 69.6          | 77.2  | 24.3  | 17.0  | --    | --   | 188.1 |
| 1-nonadecene    | 49.4          | 39.3  | 13.0  | 15.8  | --    | --   | 117.5 |
| 1-eicosene      | 40.8          | 27.3  | 6.7   | 16.8  | --    | --   | 91.6  |
| <i>Mro</i> UPO  |               |       |       |       |       |      |       |
| 1-dodecene      | 257.4         | 11.0  | --    | --    | --    | 2.0  | 270.4 |
| 1-tridecene     | 296.0         | 10.6  | 1.3   | --    | --    | --   | 307.9 |
| 1-tetradecene   | 345.3         | 15.7  | 2.7   | --    | --    | 3.8  | 367.4 |
| 1-pentadecene   | 353.4         | 12.1  | --    | --    | --    | 2.4  | 367.9 |
| 1-hexadecene    | 397.5         | 15.1  | 2.0   | --    | --    | --   | 414.6 |
| 1-heptadecene   | 397.5         | 13.1  | 1.2   | --    | --    | 5.6  | 417.4 |
| 1-octadecene    | 391.9         | 12.1  | --    | --    | --    | 7.2  | 411.2 |
| 1-nonadecene    | 384.3         | 11.6  | --    | --    | --    | 4.0  | 399.9 |
| 1-eicosene      | 308.8         | 51.5  | --    | --    | --    | --   | 360.3 |
| <i>rCci</i> UPO |               |       |       |       |       |      |       |
| 1-dodecene      | 269.6         | 101.6 | 96.0  | 29.8  | 3.6   | 4.1  | 504.7 |
| 1-tridecene     | 291.8         | 118.5 | 108.7 | 51.8  | 9.5   | 4.2  | 584.6 |
| 1-tetradecene   | 304.2         | 117.4 | 131.8 | 80.0  | 11.1  | 4.5  | 649.0 |
| 1-pentadecene   | 264.8         | 99.6  | 119.7 | 123.9 | 25.4  | 4.6  | 638.0 |
| 1-hexadecene    | 202.3         | 71.3  | 90.5  | 189.6 | 30.0  | 9.8  | 593.4 |
| 1-heptadecene   | 159.9         | 41.3  | 37.0  | 294.6 | 49.1  | --   | 581.8 |
| 1-octadecene    | 91.7          | 18.3  | 14.6  | 243.6 | --    | --   | 368.2 |
| 1-nonadecene    | 25.0          | 4.5   | 2.6   | 152.7 | --    | --   | 184.8 |
| 1-eicosene      | 22.4          | 5.1   | 1.9   | 92.4  | --    | --   | 121.8 |
| <i>Cgl</i> UPO  |               |       |       |       |       |      |       |
| 1-dodecene      | 214.3         | 61.5  | 33.8  | 7.0   | --    | --   | 316.6 |
| 1-tridecene     | 252.3         | 54.2  | 46.5  | 9.9   | --    | --   | 362.9 |
| 1-tetradecene   | 298.2         | 53.8  | 60.3  | 11.8  | --    | --   | 424.1 |
| 1-pentadecene   | 350.0         | 54.5  | 87.7  | 26.7  | --    | --   | 518.9 |
| 1-hexadecene    | 241.1         | 51.1  | 117.2 | 36.9  | --    | --   | 446.4 |
| 1-heptadecene   | 157.3         | 33.2  | 76.6  | 30.0  | --    | --   | 297.2 |
| 1-octadecene    | 51.6          | 19.8  | 28.4  | 13.6  | --    | --   | 113.4 |

|                       |       |      |      |      |     |    |       |
|-----------------------|-------|------|------|------|-----|----|-------|
| 1-nonadecene          | 50.9  | 11.5 | 20.8 | 7.8  | --  | -- | 91.1  |
| 1-eicosene            | 26.6  | 32.8 | 10.9 | 7.7  | --  | -- | 78.1  |
| <b><i>rHinUPO</i></b> |       |      |      |      |     |    |       |
| 1-dodecene            | 168.7 | 78.2 | 40.0 | --   | --  | -- | 286.8 |
| 1-tridecene           | 247.3 | 85.0 | 73.5 | 35.2 | --  | -- | 441.0 |
| 1-tetradecene         | 200.5 | 53.4 | 41.9 | 23.3 | --  | -- | 319.1 |
| 1-pentadecene         | 187.5 | 68.2 | 86.4 | 33.8 | --  | -- | 375.9 |
| 1-hexadecene          | 224.3 | 67.2 | 96.5 | 49.7 | --  | -- | 437.7 |
| 1-heptadecene         | 146.3 | 44.9 | 73.4 | 62.2 | --  | -- | 326.7 |
| 1-octadecene          | 137.1 | 36.7 | 27.3 | 39.7 | --  | -- | 240.8 |
| 1-nonadecene          | 169.4 | 22.8 | 17.5 | 21.3 | --  | -- | 231.0 |
| 1-eicosene            | 34.9  | 11.0 | 22.7 | 13.3 | --  | -- | 81.9  |
| <b><i>rDcaUPO</i></b> |       |      |      |      |     |    |       |
| 1-dodecene            | 92.3  | 60.8 | 37.6 | 9.5  | --  | -- | 200.2 |
| 1-tridecene           | 91.7  | 47.6 | 45.0 | 13.7 | --  | -- | 198.0 |
| 1-tetradecene         | 70.1  | 43.3 | 41.6 | 10.8 | 4.5 | -- | 170.3 |
| 1-pentadecene         | 58.9  | 33.4 | 34.2 | 11.1 | --  | -- | 137.6 |
| 1-hexadecene          | 24.3  | 22.9 | 15.7 | 0.8  | --  | -- | 63.7  |
| 1-heptadecene         | 13.1  | 14.0 | 16.7 | 4.5  | --  | -- | 48.4  |
| 1-octadecene          | 5.7   | 21.0 | 3.9  | --   | --  | -- | 30.7  |
| 1-nonadecene          | 8.0   | 9.9  | 9.5  | --   | --  | -- | 27.4  |
| 1-eicosene            | 1.0   | 2.7  | 4.0  | --   | --  | -- | 7.7   |

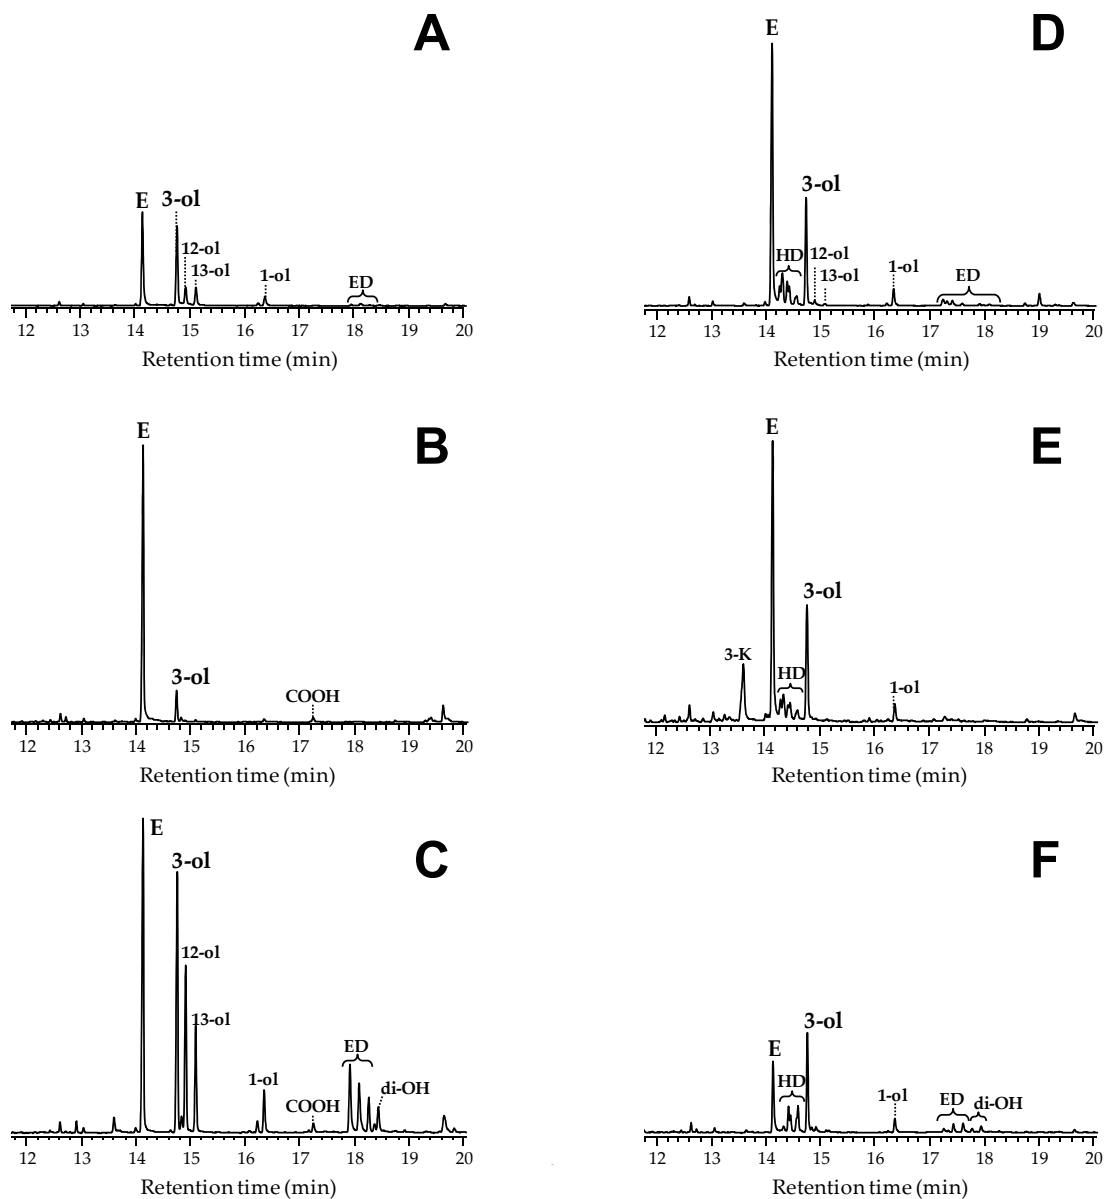

**Figure S3.** GC-MS analysis of 1-tetradecene (1 mM) reactions (2 h) with 3  $\mu$ M *Aae*UPO (**A**), *Mro*UPO (**B**), *rCci*UPO (**C**), *Cgl*UPO (**D**), *rHin*UPO (**E**) and *rDca*UPO (**F**). The main products are 1,2-epoxytetradecane (**E**) and several monohydroxy alkenes (1-ol, 3-ol, 12-ol and 13-ol), together with some epoxy derivatives (**ED**) and dihydroxy (di-OH) and carboxylic (COOH) alkene derivatives. The chromatograms are normalized to same total-ion vertical scale for comparison.

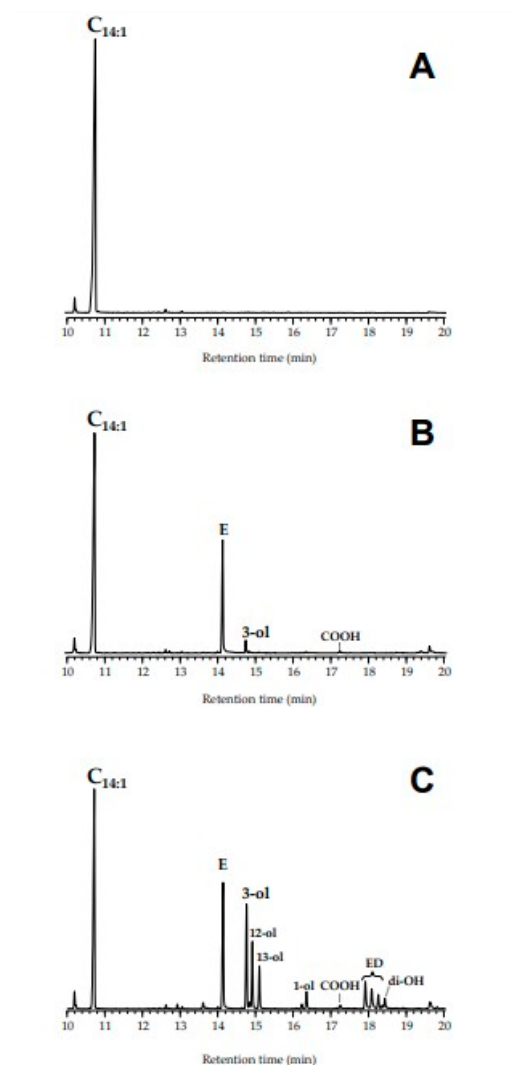

**Figure S4.** GC-MS analysis of 1-tetradecene (1 mM) reactions (2 h) including control reaction with 3 mM H<sub>2</sub>O<sub>2</sub> and without enzyme (A), enzymatic reaction with 3 μM MroUPO and 3 mM H<sub>2</sub>O<sub>2</sub> (B) and enzymatic reaction with 3 μM rCciUPO and 3 mM H<sub>2</sub>O<sub>2</sub> (C)..
